# Supplementary material for: Incorporation/Enrichment of 3D Bioprinted Constructs by Biomimetic Nanoparticles: Tuning Printability and Cell Behavior in Bone Models
Source: MDPI journal article supplement (doi:10.3390/nano13142040), 2023-07-10
Supplement: s1 [file s1]

## Evaluation of the metabolic activity of SAOS-2 cells embedded in bulk inks.

For all conditions, i.e. negligent of the nanoparticles and concentration (up to 2%), cells viability is maintained overtime and shows a positive trend until 14d of culture in all the samples with nHA and Sr-HA particles, with only Alg2SrHA showing a decrease at the last timepoint

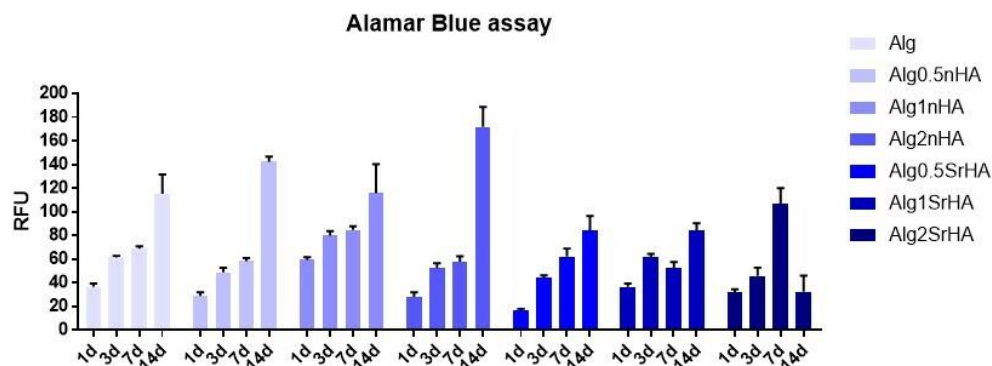

**Figure S1.** Metabolically active Saos-2 cells in bulk samples at all the considered timepoints (1d, 3d, 7d and 14d) (\* p-value  $\leq 0.05$ , \*\*  $p \leq 0.01$ , \*\*\*  $p \leq 0.001$ , \*\*\*\*  $p \leq 0.0001$ ). For 1d of culture: Alg vs Alg2nHA  $p=0.0001$  \*\*\*\*; Alg vs Alg0.5SrHA  $p=0.0003$  \*\*\*; Alg1nHA vs Alg0.5nHA  $p<0.0001$  \*\*\*\*; Alg0.5nHA vs Alg0.5SrHA  $p=0.0022$  \*\*; Alg1nHA vs Alg2nHA  $p<0.0001$  \*\*\*\*; Alg1nHA vs Alg0.5SrHA  $p<0.0001$  \*\*\*\*; Alg1nHA vs Alg1SrHA  $p=0.0001$  \*\*\*\*; Alg1nHA vs Alg2SrHA  $p<0.0001$  \*\*\*\*; Alg2nHA vs Alg0.5SrHA  $p=0.0067$  \*\*; Alg0.5SrHA vs Alg1SrHA  $p<0.0001$  \*\*\*\*; Alg2SrHA vs Alg0.5SrHA  $p=0.0004$  \*\*\*. For 14d of culture: Alg vs Alg2nHA  $p=0.0428$  \*; Alg vs Alg0.5SrHA  $p=0.036$  \*; Alg vs Alg2SrHA  $p=0.0105$  \*; Alg1nHA vs Alg0.5nHA  $p=0.0377$  \*; Alg2nHA vs Alg0.5nHA  $p=0.0464$  \*; Alg0.5nHA vs Alg0.5SrHA  $p=0.0007$  \*\*\*; Alg0.5nHA vs Alg1SrHA  $p<0.0001$  \*\*\*\*; Alg0.5nHA vs Alg2SrHA  $p<0.0001$  \*\*\*\*; Alg1nHA vs Alg2nHA  $p=0.0243$  \*; Alg1nHA vs Alg0.5SrHA  $p=0.0153$  \*; Alg1nHA vs Alg2SrHA  $p=0.0079$  \*\*; Alg2nHA vs Alg0.5SrHA  $p=0.0001$  \*\*\*\*; Alg2nHA vs Alg1SrHA  $p<0.0001$  \*\*\*\*; Alg2nHA vs Alg2SrHA  $p<0.0001$  \*\*\*\*; Alg2SrHA vs Alg1SrHA  $p=0.013$  \*.
